# Supplementary material for: Identification of a Novel Antibody Associated with Autoimmune Pancreatitis
Source: Atypon-hosted journal article supplement (doi:10.1056/nejmoa0903068), 2009-11-25
Supplement: nejm_frulloni_2135sa1.pdf [file nejm_frulloni_2135sa1.pdf]

## Supplementary Appendix

This appendix has been provided by the authors to give readers additional information about their work.

Supplement to: Frulloni L, Lunardi C, Simone R, et al. Identification of a novel antibody associated with autoimmune pancreatitis. *N Engl J Med* 2009;361:2135-42.

**Inhibition experiments confirm cross-reactivity between anti-Helicobacter plasminogen-binding protein and anti-UBR2 peptide antibodies.**

Panel A: Inhibition of binding of serum antibodies to purified *H. pylori* protein

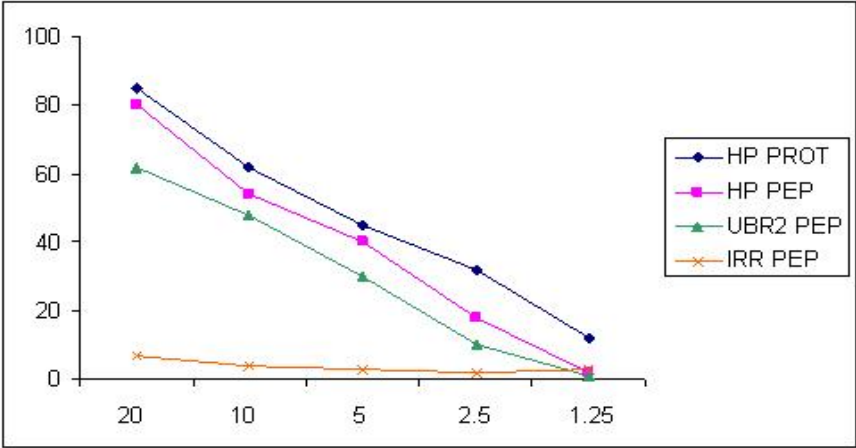

Panel B: Inhibition of binding of serum antibodies to UBR2 peptide

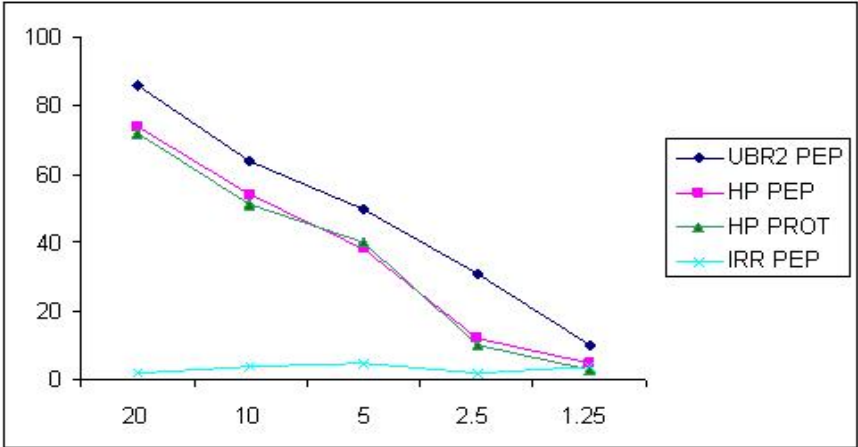

Panel A: serum from an AIP patient, at a dilution that achieved 50% of the maximal binding to the Helicobacter plasminogen-binding protein coated plate (1:400), was preincubated with increasing concentrations of either purified *H. pylori* protein (HP PROT) or PBP peptide (HP PEP) or UBR peptide (UBR2 PEP) or an irrelevant peptide (IRR PEP) for 1 hour at 37 C. The mixture was then transferred to the *H.pylori* derived protein coated ELISA plate. The remainder of the assay was then carried out as a direct ELISA test.

The binding to the protein is inhibited by the Helicobacter protein, the PBP peptide and by the UBR2 peptide, but not by the irrelevant control peptide. Similar results were obtained in 5 other samples tested. The UBR2 peptide was used instead of the protein, since UBR2 expression in the cell is too low to purify an adequate amount of protein to perform this type of experiment. Moreover the recombinant human UBR2 protein commercially available is only a part of the protein and does not comprise the homologous sequence of interest.

Panel B: serum from an AIP patient, at a dilution that achieved 50% of the maximal binding to a UBR2 peptide (UBR2 PEP) coated plate (1:800), was preincubated with increasing concentrations of either UBR2 peptide or purified *H. pylori* plasminogen-binding protein (HP PROT) or PBP peptide (HP PEP) or an irrelevant peptide (IRR PEP) for 1 hour at 37 C. The mixture was then transferred to a UBR2 peptide coated ELISA plate. The remainder of the assay was then carried out as a direct ELISA test.

The binding to UBR2 peptide is inhibited by the homologous peptide, by the Helicobacter protein, by the PBP peptide, but not by an irrelevant control peptide. Similar results were obtained in 4 other samples tested.

X axis: inhibitor concentration (microg/mL)

Y axis: percent of inhibition
